# Supplementary material for: Therapeutic benefit of combining calorie-restricted ketogenic diet and glutamine targeting in late-stage experimental glioblastoma
Source: Springer Nature journal article supplement (doi:10.1038/s42003-019-0455-x), 2019-05-29
Supplement: 42003_2019_455_MOESM1_ESM.pdf [file 42003_2019_455_MOESM1_ESM.pdf]

Supplementary Figure 1

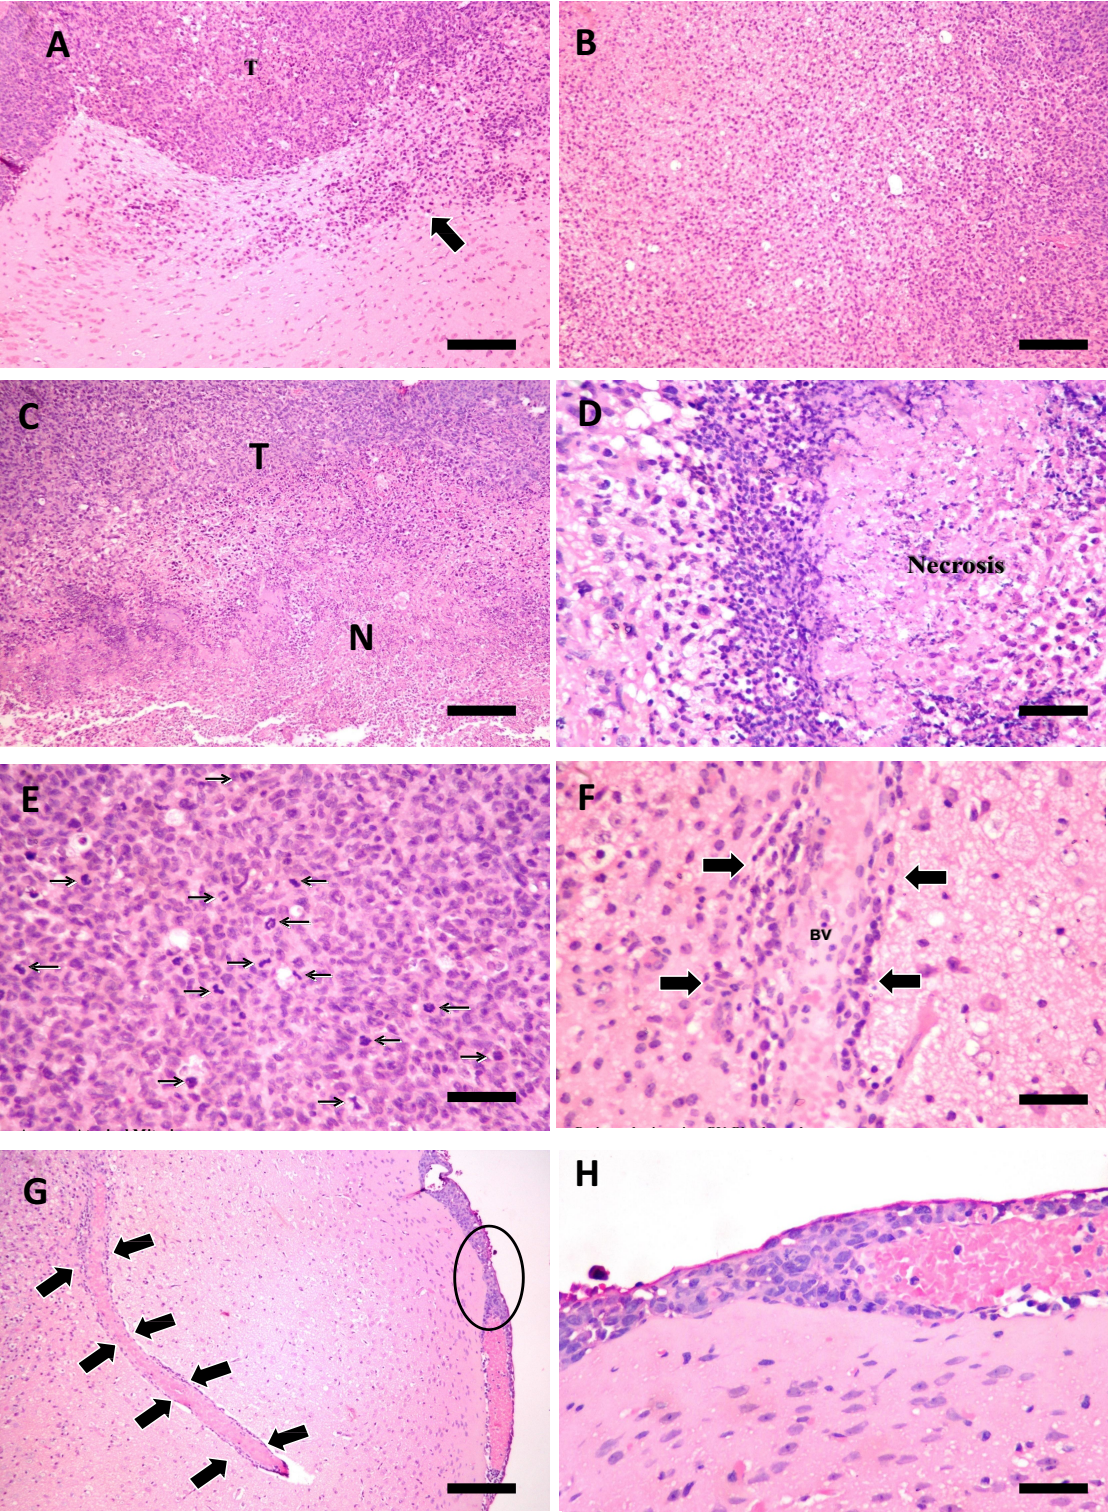

**Invasive behavior in brain of VM-M3 GBM tumour cells.** VM-M3/Fluc tumor fragments were implanted as described in **Figure 1**. Histological analysis (H&E) was used to validate the presence of tumour cells in the different regions of the brain as indicated in the figures. A defining characteristic of GBM is the secondary structures of Scherer, which is evident in panels A-H. **Panel A:** tumour cell infiltration in the brain (scale bar = 175  $\mu\text{m}$ ). **Panel B:** core tumor area (scale bar = 300  $\mu\text{m}$ ). **Panel C:** tumor (T) and necrotic (N) areas (scale bar = 525  $\mu\text{m}$ ). **Panel D:** necrosis in higher magnification (scale bar = 140  $\mu\text{m}$ ). **Panel E:** arrows indicate atypical mitosis (scale bar = 100  $\mu\text{m}$ ). **Panel F:** arrows show perivascular invasion (scale bar = 65  $\mu\text{m}$ ). **Panel G:** arrows show perivascular invasion and circle shows sub-arachnoid invasion (scale bar = 200  $\mu\text{m}$ ). **Panel H:** subarachnoid space infiltration in higher magnification (scale bar = 65  $\mu\text{m}$ ).

Supplementary Figure 2

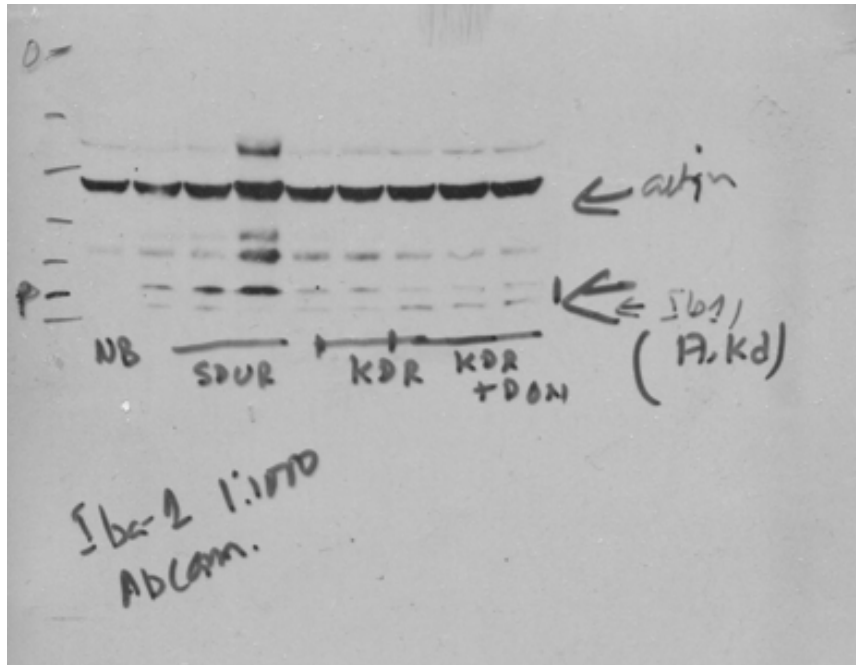

**Original immunoblot for panel figure 6b showing KD-R with DON reduces Iba-1 in VM-M3 brain tumour tissue.** The expression of Iba-1 (17kd) decreased in the DON treated tumours (n=3 mouse tumour brain tissue) in comparison to SD-UR (n=3 mouse tumour brain tissue). A decrease in expression was also seen for KD-R mice (n=2 mouse tumour brain tissue). Normal brain (NB) was used as a negative control tissue. Actin was used on the same membrane as a loading control. No image alterations were performed on original immunoblots other than cropping to create the figures in the manuscript.

Supplementary Figure 3

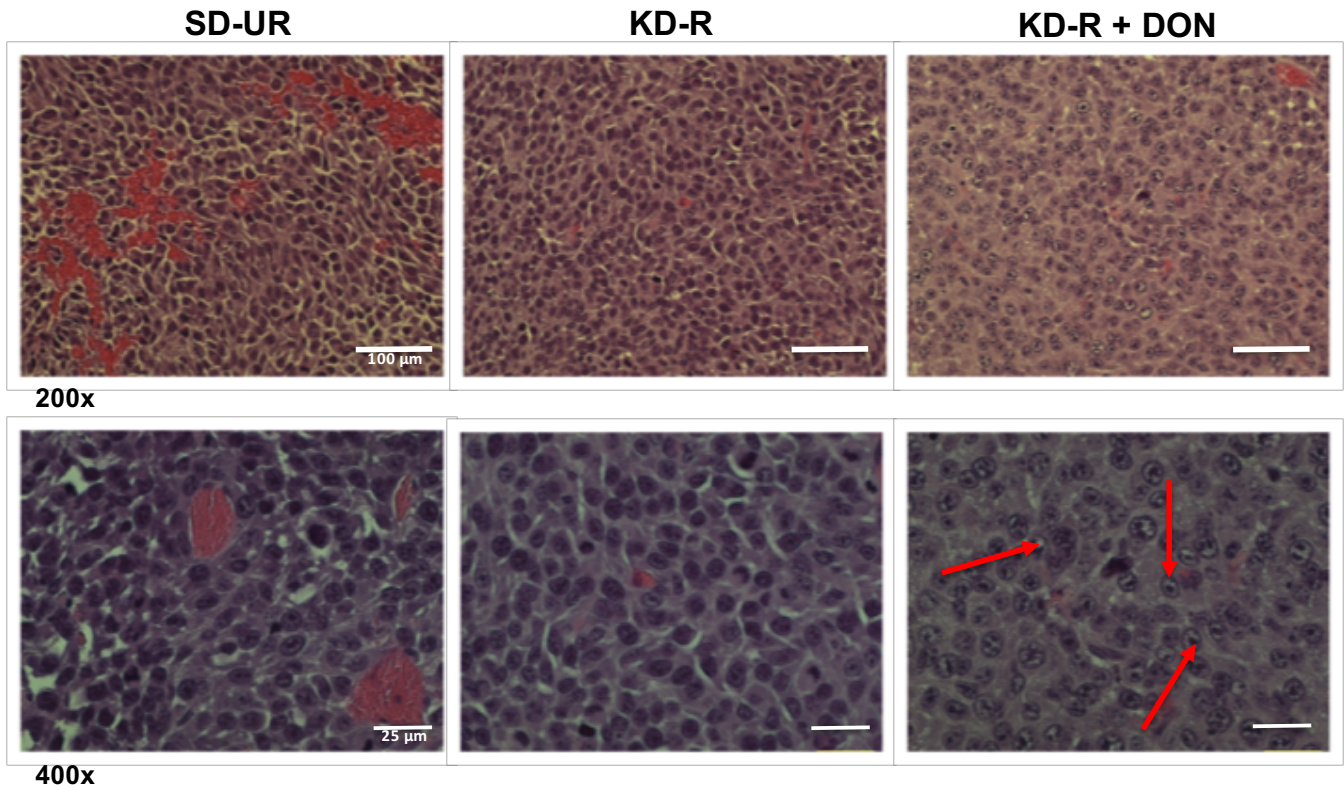

**Histological analysis of KD-R and DON treated CT-2A tumour brains.** H&E was used to validate the influence of the KD-R and DON treatment on the CT-2A tumor cells. Images show the tumor core at 200 x (top), and at 400 x (bottom). Arrows indicate nuclear mitotic arrest. All scale bars are 100 μm for 200x and 25μm for 400x.

## Supplementary Figure 4

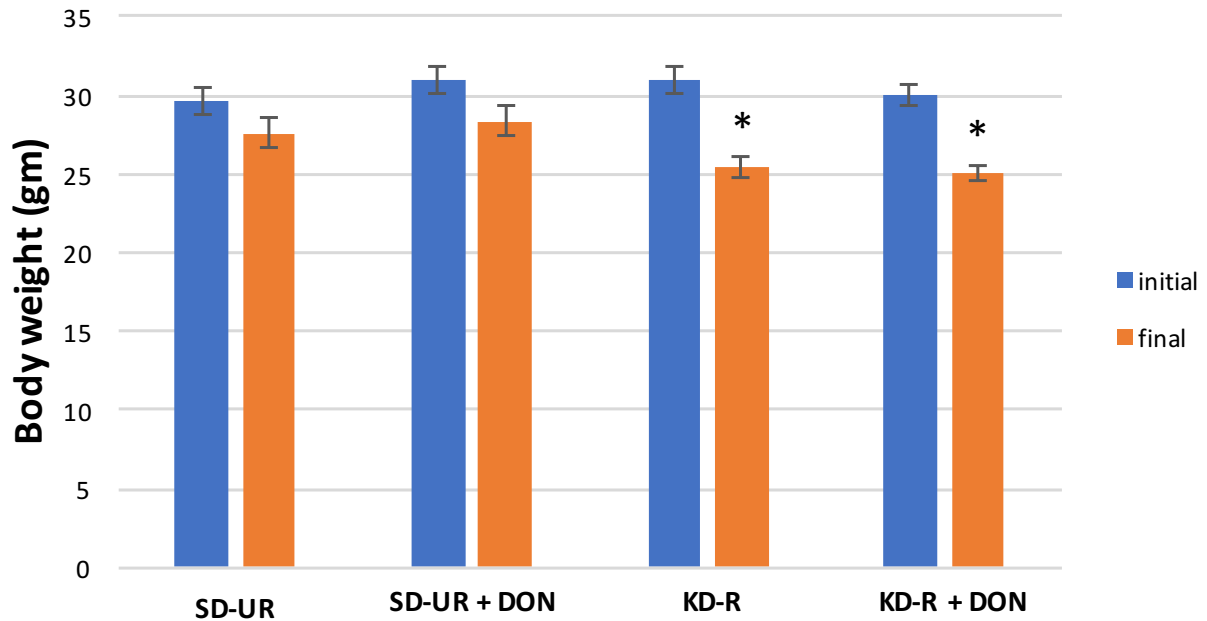

**Body weights of VM-M3 tumour bearing mice.** VM-M3/Fluc tumour fragments were implanted as described in Figure 1. Body weight was determined every alternate day. Initial and final body weight data are presented. Mice fed the SD-UR began to drop body weight on the day of termination due to tumour burden. Mice fed the KD-R maintained a 15-18 % body weight reduction throughout the experiment due to reduced caloric intake. Initial and final body weights were similar in the SD-UR and the SD-UR + DON mice (n = 15 mice/group). Final body weights were lower than initial body weights in the KD-R and the KD-R + DON mice (n=15 mice/each group). Values are expressed as the mean +/- SEM and a two tailed student's t-test was performed between the initial and final values of each group ( \* = p<.01).

**Supplementary Table 1**

| <b>Composition (%) of the standard diet and the ketogenic diet</b> |                      |                       |
|--------------------------------------------------------------------|----------------------|-----------------------|
| <b>Components</b>                                                  | <b>Standard Diet</b> | <b>Ketogenic Diet</b> |
| Carbohydrate                                                       | 62                   | 3                     |
| Fat                                                                | 6                    | 72                    |
| Protein                                                            | 27                   | 15                    |
| Energy (Kcal/g)                                                    | 4.4                  | 7.2                   |
